# Supplementary material
Source: publisher figshare collection journal article supplement (https://acs.figshare.com/ndownloader/files/5762166)
Supplement: Supplementary file 1 [file 5762166]

## **Mono- and Dinuclear Silica-Supported Titanium (IV) Complexes and the Effect of TiOTi Connectivity on Reactivity**

**Abdillahi Omar Bouh, Gordon L. Rice, and Susannah L. Scott\***

**Supplementary Material.** Figures S1-S3 and S5-S7 containing IR and  $^{13}\text{C}$  CP/MAS NMR spectra analogous to those shown in the published paper, but on Silica-200.

**Figure S1:**  $^{13}\text{C}$  CP/MAS NMR spectra of silica-200 treated with a)  $\text{Ti}(\text{O}^i\text{Pr})_4$ , b)  $\text{Ti}(\text{NEt}_2)_4$ , followed by desorption of unreacted starting material and evacuation of volatile products. Spin rate 4kHz.

**Figure S2:** In situ IR difference spectra of self-supporting disk of silica-200, treated under conditions identical to those of Figure 2.

**Figure S3:** In situ IR difference spectra of self-supporting disk of silica-200, treated under conditions identical to those of Figure 3.

**Figure S5:** In situ IR difference spectra of self-supporting disk of silica-200, treated under conditions identical to those of Figure 5.

**Figure S6:**  $^{13}\text{C}$  CP/MAS NMR spectra of silica-200 modified with  $\text{Ti}(\text{NEt}_2)_4$ , followed by a) *tert*-butanol; or b) 2-propanol. In each case, unreacted reagents were removed by evacuation before the spectrum was recorded. Spin rate 4kHz.

**Figure S7:** In situ IR difference spectra of self-supporting disk of silica-200, treated under conditions identical to those of Figure 7.

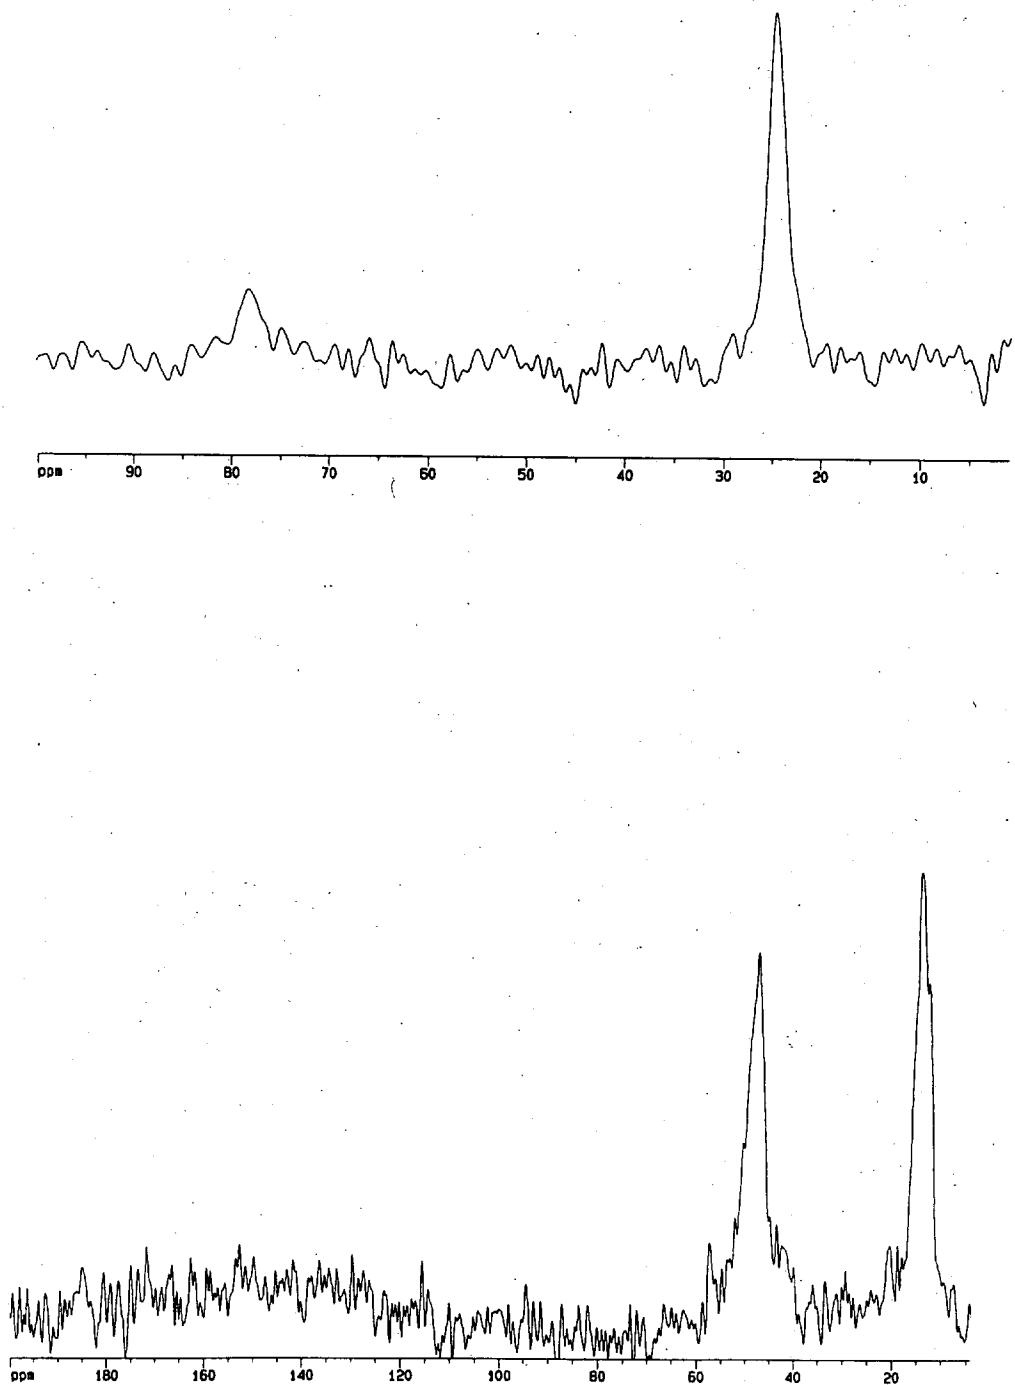

Figure S1

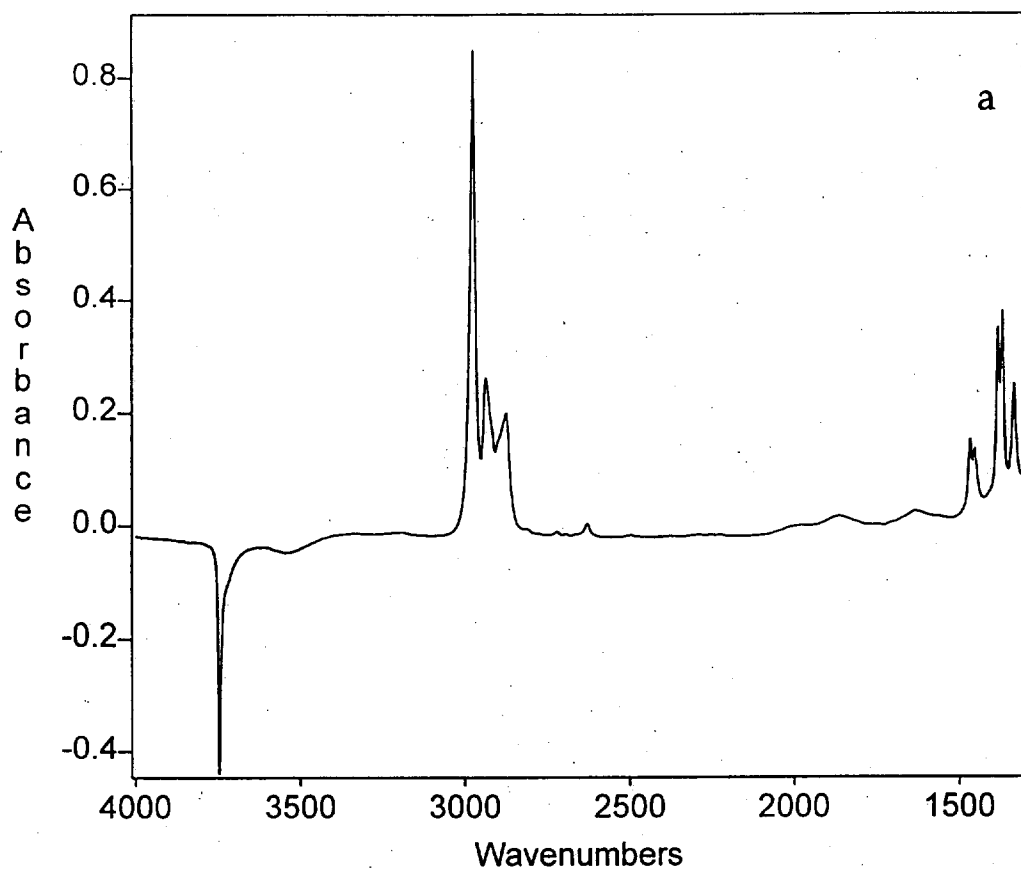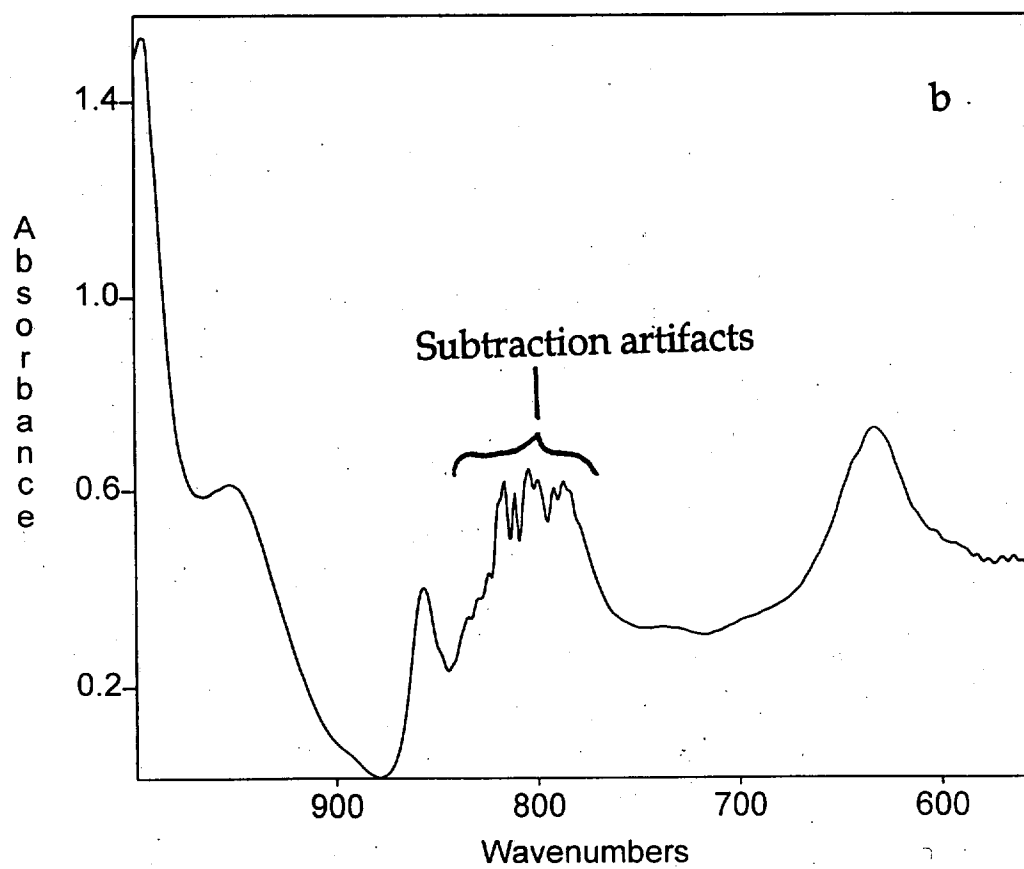

Figure S2

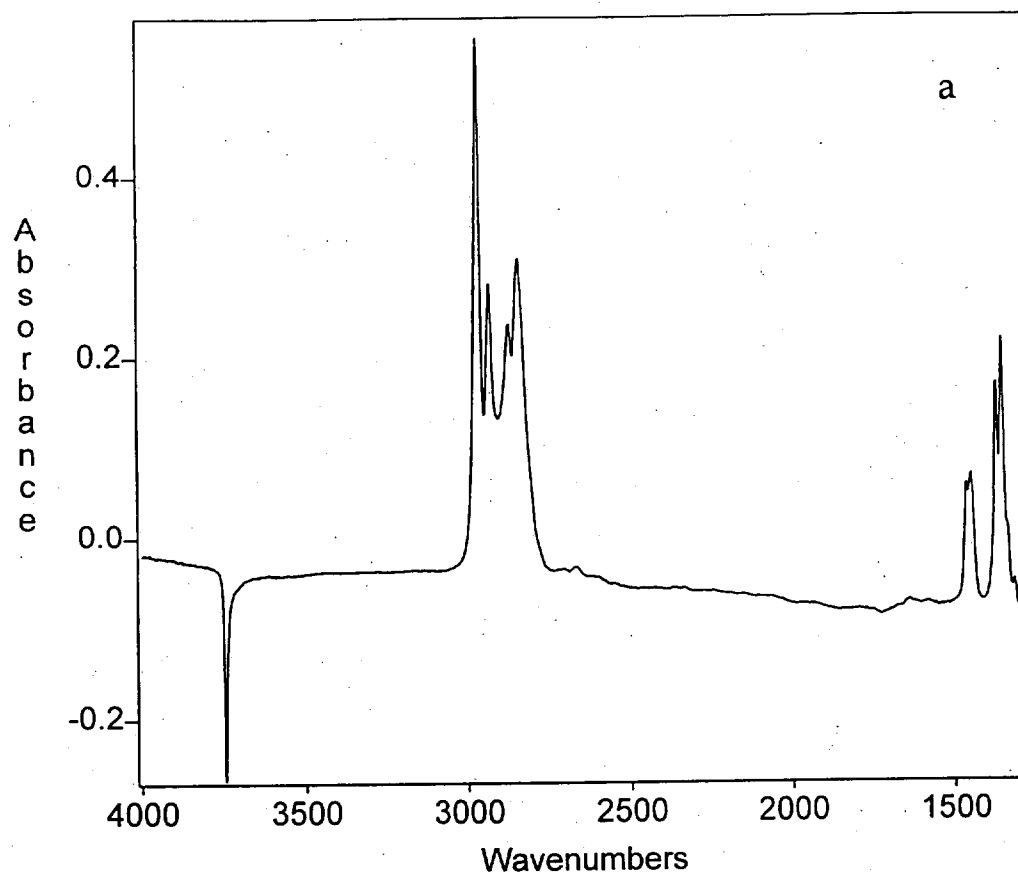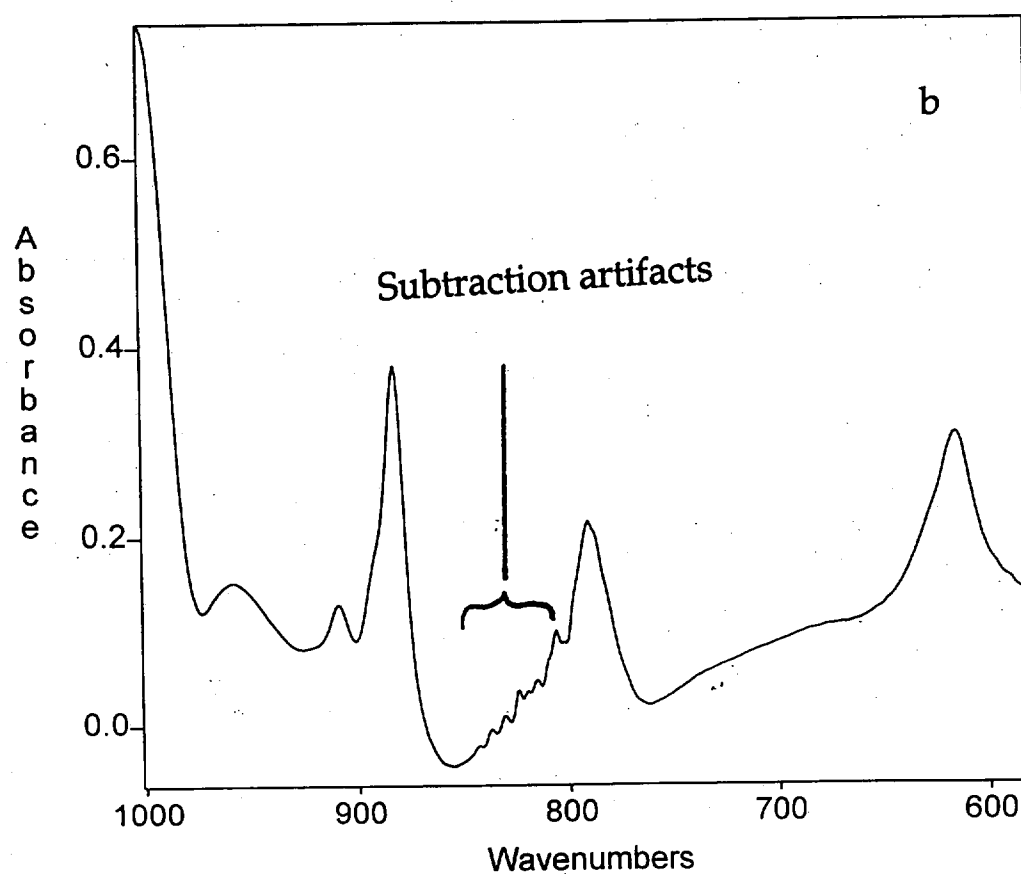

Figure S3

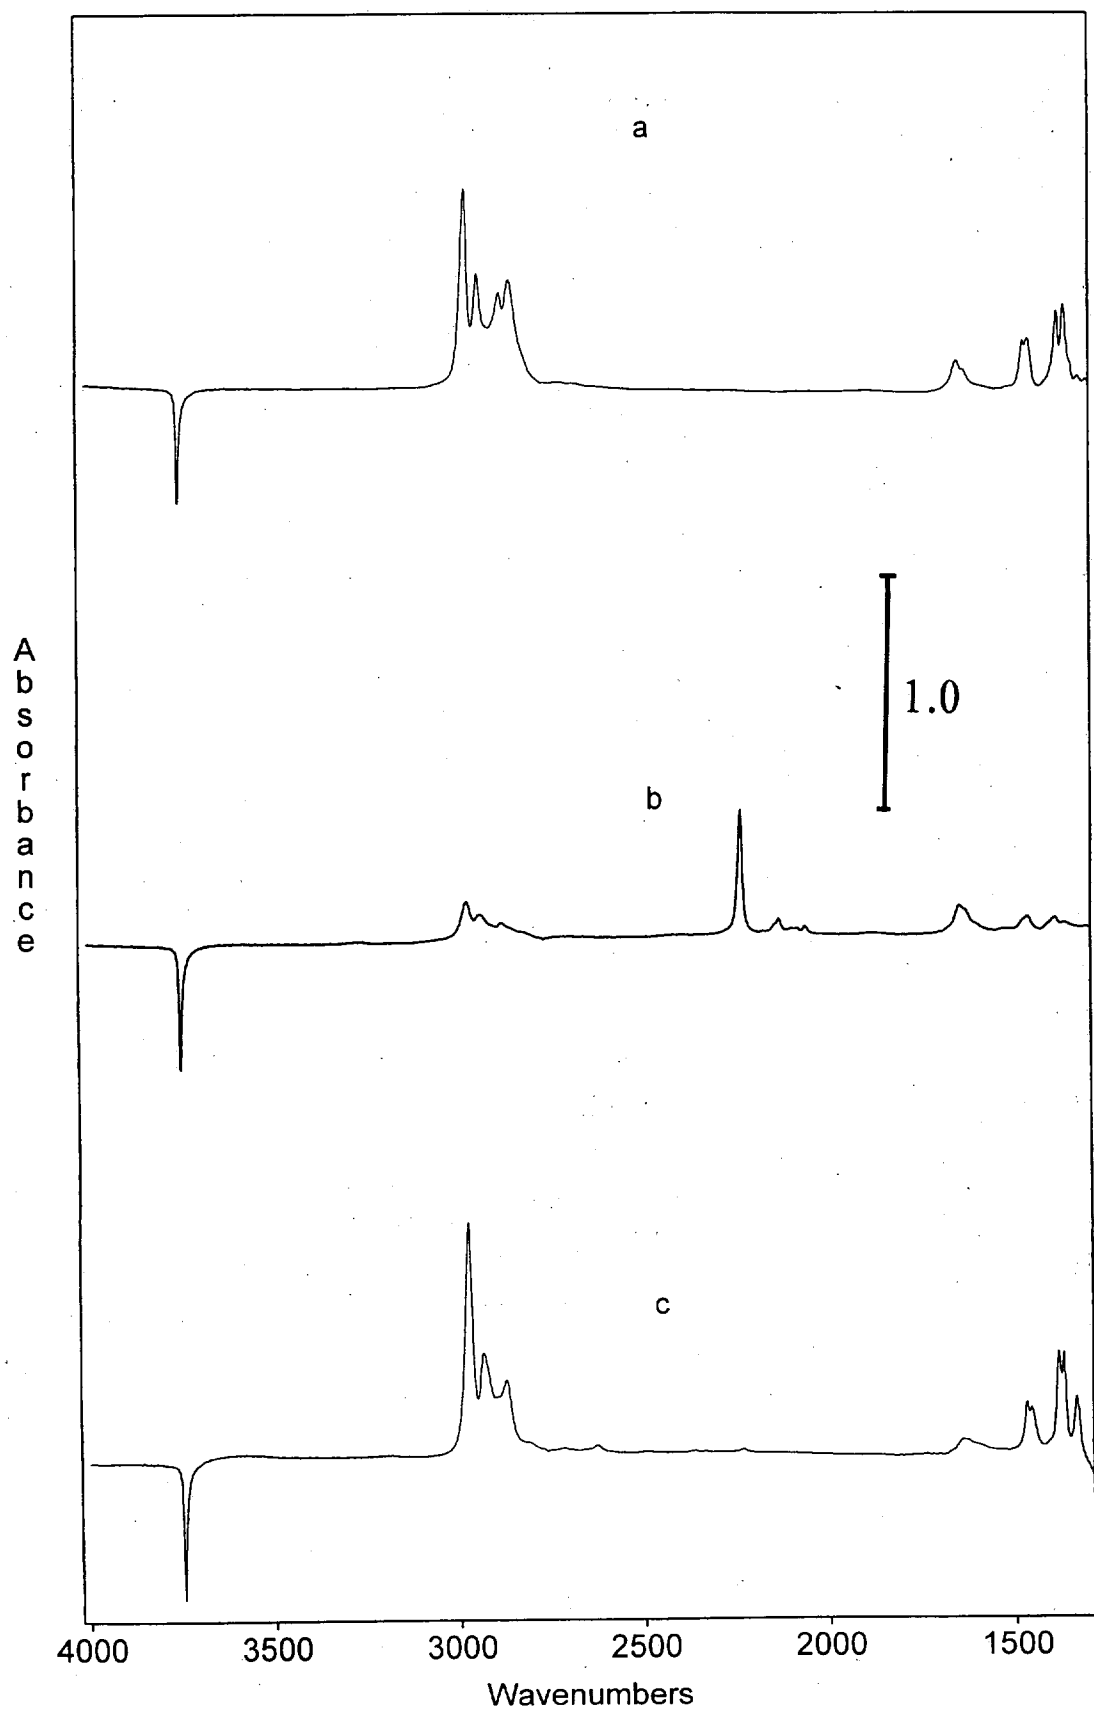

Figure S5

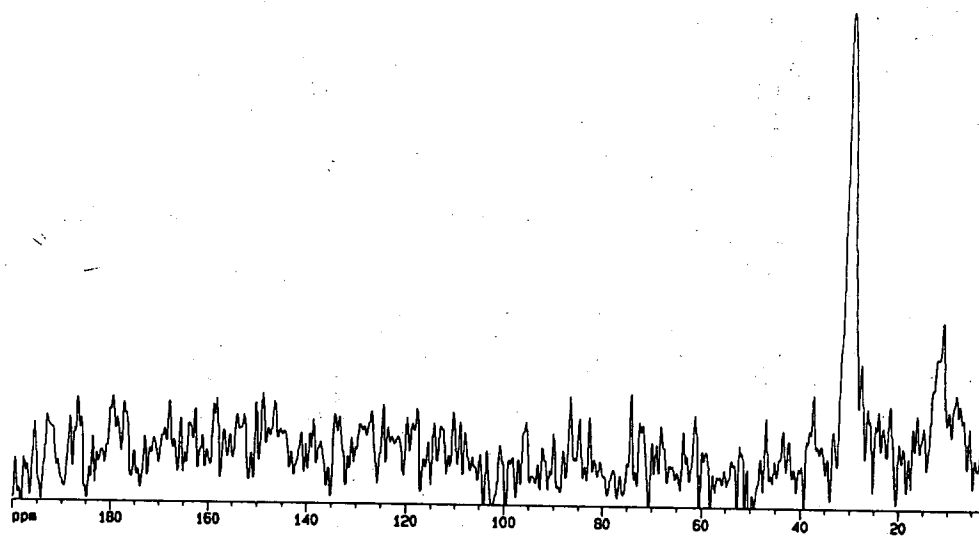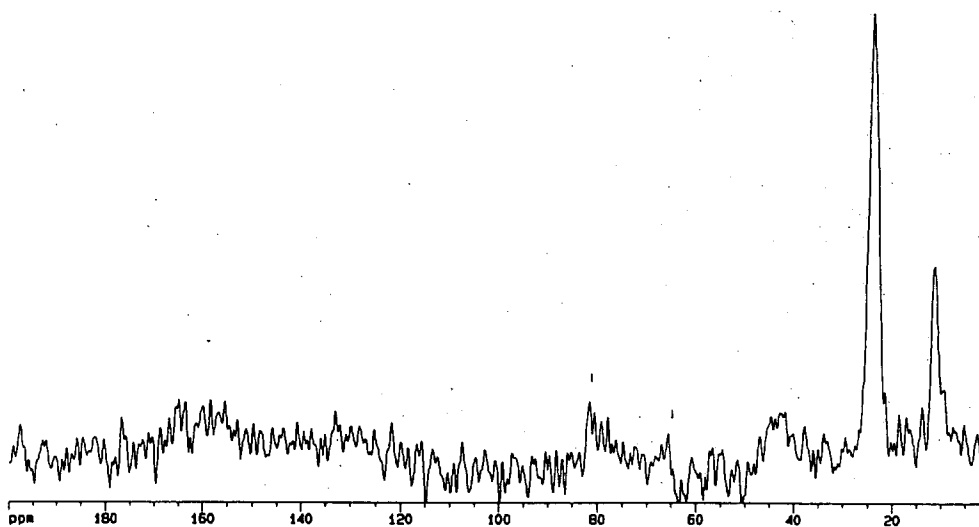

Figure S6

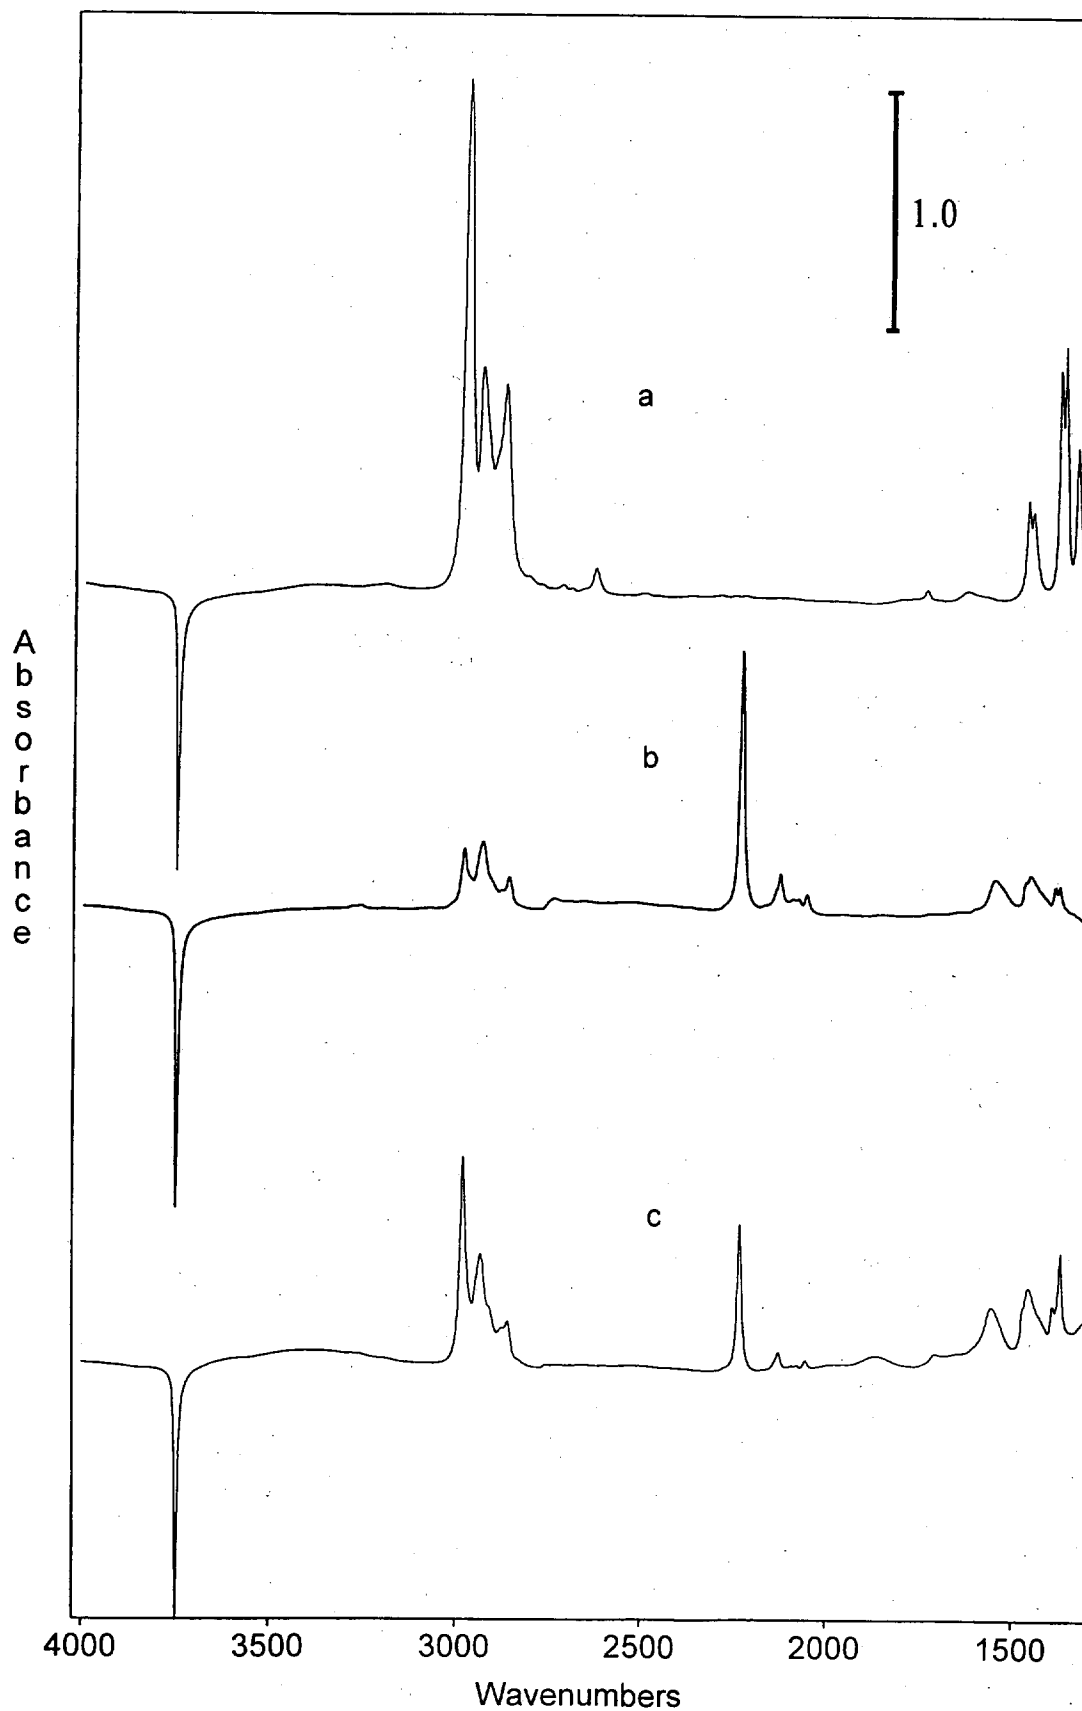

Figure S7
